# Supplementary material for: Machine Learning-Driven Classification of Urease Inhibitors Leveraging Physicochemical Properties as Effective Filter Criteria
Source: MDPI journal article supplement (doi:10.3390/ijms25084303), 2024-04-13
Supplement: s1 [file s1]

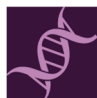

Article

# Machine Learning-Driven Classification of Urease Inhibitors Leveraging Physicochemical Properties as Effective Filter Criteria

Natalia Morales <sup>1</sup>, Elizabeth Valdés-Muñoz <sup>2</sup>, Jaime González <sup>1</sup>, Paulina Valenzuela-Hormazábal <sup>3</sup>, Jonathan M. Palma <sup>4</sup>, Christian Galarza <sup>5</sup>, Ángel Catagua-González <sup>5</sup>, Osvaldo Yáñez <sup>6</sup>, Alfredo Pereira <sup>7,\*</sup> and Daniel Bustos <sup>8,\*</sup>

<sup>1</sup> Magíster en Ciencias de la Computación, Universidad Católica del Maule, Talca 3460000, Chile; nmoralesr@ucm.cl (N.M.); jaime.gonzalez@alu.ucm.cl (J.G.)

<sup>2</sup> Doctorado en Biotecnología Traslacional, Centro de Biotecnología de los Recursos Naturales, Universidad Católica del Maule, Talca 3480094, Chile; elizabeth.valdes@alu.ucm.cl

<sup>3</sup> Departamento de Farmacología, Facultad de Ciencias Biológicas, Universidad de Concepción, Concepción 4030000, Chile; paulinvalenzuela@udec.cl

<sup>4</sup> Facultad de Ingeniería, Universidad de Talca, Curicó 3344158, Chile; jonathan.palma@utalca.cl

<sup>5</sup> Departamento de Matemáticas, Facultad de Ciencias Naturales y Matemáticas, Escuela Superior Politécnica del Litoral, Guayaquil EC090903, Ecuador; chedgala@espol.edu.ec (C.G.); anglucat@espol.edu.ec (Á.C.-G.)

<sup>6</sup> Núcleo de Investigación en Data Science, Facultad de Ingeniería y Negocios, Universidad de las Américas, Santiago 7500000, Chile; oyanez@udla.cl

<sup>7</sup> Facultad de Ingeniería, Arquitectura y Diseño, Universidad San Sebastián, Bellavista 7, Santiago 8420524, Chile

<sup>8</sup> Laboratorio de Bioinformática y Química Computacional, Departamento de Medicina Traslacional, Facultad de Medicina, Universidad Católica del Maule, Talca 3480094, Chile

\* Correspondence: alfredo.pereira@uss.cl (A.P.); dbustos@ucm.cl (D.B.)

**Citation:** Morales, N.; Valdés-Muñoz, E.; González, J.; Valenzuela-Hormazábal, P.; Palma, J. M.; Galarza, C.; Catagua-González, Á.; Yáñez, O.; Pereira, A.; Bustos, D. Machine Learning-Driven Classification of Urease Inhibitors Leveraging Physicochemical Properties as Effective Filter Criteria. *Int. J. Mol. Sci.* **2024**, *25*, 4303. <https://doi.org/10.3390/ijms25084303>

Academic Editor: Dong-Jun Yu

Received: 15 March 2024

Revised: 3 April 2024

Accepted: 8 April 2024

Published: 13 April 2024

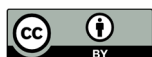

**Copyright:** © 2024 by the authors. Licensee MDPI, Basel, Switzerland. This article is an open access article distributed under the terms and conditions of the Creative Commons Attribution (CC BY) license (<https://creativecommons.org/licenses/by/4.0/>).

**Table S1.** Physicochemical descriptors obtained from rCDK program.

| Feature name                                                                                                                                                                                                                                                                                                                                                                                                                                                                                                                                                                                                                                                                                                                                       | Description                                                                                                                                                                                                                             |
|----------------------------------------------------------------------------------------------------------------------------------------------------------------------------------------------------------------------------------------------------------------------------------------------------------------------------------------------------------------------------------------------------------------------------------------------------------------------------------------------------------------------------------------------------------------------------------------------------------------------------------------------------------------------------------------------------------------------------------------------------|-----------------------------------------------------------------------------------------------------------------------------------------------------------------------------------------------------------------------------------------|
| <b>Topological parameters</b>                                                                                                                                                                                                                                                                                                                                                                                                                                                                                                                                                                                                                                                                                                                      |                                                                                                                                                                                                                                         |
| ECCEN                                                                                                                                                                                                                                                                                                                                                                                                                                                                                                                                                                                                                                                                                                                                              | Calculation that integrates distance and adjacency information.                                                                                                                                                                         |
| fragC                                                                                                                                                                                                                                                                                                                                                                                                                                                                                                                                                                                                                                                                                                                                              | Calculate the complexity of a molecule                                                                                                                                                                                                  |
| Kier1 Kier2 Kier3                                                                                                                                                                                                                                                                                                                                                                                                                                                                                                                                                                                                                                                                                                                                  | Calculate the Kier and Hall kappa molecular shape indices, which are descriptors used to quantify the shape of molecules. These indices provide a numerical value that represents the overall structural characteristics of a molecule. |
| khs.sLi khs.ssBe khs.ssssBe<br>khs.ssBH khs.sssB khs.ssssB<br>khs.sCH3 khs.dCH2<br>khs.ssCH2<br>khs.tCH khs.dsCH<br>khs.aaCH khs.sssCH<br>khs.ddC khs.tsC<br>khs.dssC khs.aasC khs.aaaC<br>khs.ssssC khs.sNH3<br>khs.sNH2 khs.ssNH2<br>khs.dNH khs.ssNH<br>khs.aaNH khs.tN khs.sssNH<br>khs.dsN khs.aaN khs.sssN<br>khs.ddsN khs.aasN khs.ssssN<br>khs.sOH khs.dO<br>khs.ssO khs.aaO<br>khs.sF khs.sSiH3 khs.ssSiH2<br>khs.sssSiH khs.ssssSi<br>khs.sPH2 khs.ssPH khs.sssP<br>khs.dsssP khs.sssssP<br>khs.sSH khs.dS<br>khs.ssS khs.aaS khs.dssS<br>khs.ddssS khs.sCl khs.sGeH3<br>khs.ssGeH2 khs.sssGeH<br>khs.ssssGe khs.sAsH2<br>khs.ssAsH khs.sssAs<br>khs.sssdAs khs.sssssAs<br>khs.sSeH khs.dSe<br>khs.ssSe khs.aaSe<br>khs.dssSe khs.ddssSe | Compute the occurrences of the E- state fragments.                                                                                                                                                                                      |

|                       |            |                                                                                                                                                                                                                                                                                                                                                                                                                                                                                                                                                                                                                                                |
|-----------------------|------------|------------------------------------------------------------------------------------------------------------------------------------------------------------------------------------------------------------------------------------------------------------------------------------------------------------------------------------------------------------------------------------------------------------------------------------------------------------------------------------------------------------------------------------------------------------------------------------------------------------------------------------------------|
| khs.sBr               | khs.sSnH3  |                                                                                                                                                                                                                                                                                                                                                                                                                                                                                                                                                                                                                                                |
| khs.ssSnH2            | khs.sssSnH |                                                                                                                                                                                                                                                                                                                                                                                                                                                                                                                                                                                                                                                |
| khs.ssssSn            | khs.sI     | khs.sPbH3                                                                                                                                                                                                                                                                                                                                                                                                                                                                                                                                                                                                                                      |
| khs.ssPbH2            | khs.sssPbH |                                                                                                                                                                                                                                                                                                                                                                                                                                                                                                                                                                                                                                                |
| khs.ssssPb            |            |                                                                                                                                                                                                                                                                                                                                                                                                                                                                                                                                                                                                                                                |
| MDEC-11               | MDEC-12    | Calculate the molecular distance edge descriptors, which are used to assess the distances between specific atoms in a molecule. In the case of carbon (C), nitrogen (N), and oxygen (O) atoms, these descriptors can provide valuable information about the connectivity and spatial arrangement of these elements within a molecule.                                                                                                                                                                                                                                                                                                          |
| MDEC-13               | MDEC-14    |                                                                                                                                                                                                                                                                                                                                                                                                                                                                                                                                                                                                                                                |
| MDEC-22               | MDEC-23    |                                                                                                                                                                                                                                                                                                                                                                                                                                                                                                                                                                                                                                                |
| MDEC-24               | MDEC-33    |                                                                                                                                                                                                                                                                                                                                                                                                                                                                                                                                                                                                                                                |
| MDEC-34               | MDEC-44    |                                                                                                                                                                                                                                                                                                                                                                                                                                                                                                                                                                                                                                                |
| MDEO-11               | MDEO-12    |                                                                                                                                                                                                                                                                                                                                                                                                                                                                                                                                                                                                                                                |
| MDEO-22               | MDEN-11    |                                                                                                                                                                                                                                                                                                                                                                                                                                                                                                                                                                                                                                                |
| MDEN-12               | MDEN-13    |                                                                                                                                                                                                                                                                                                                                                                                                                                                                                                                                                                                                                                                |
| MDEN-22               | MDEN-23    |                                                                                                                                                                                                                                                                                                                                                                                                                                                                                                                                                                                                                                                |
| MDEN-33               |            |                                                                                                                                                                                                                                                                                                                                                                                                                                                                                                                                                                                                                                                |
| PetitjeanNumber       |            | Calculate the Petitjean Number, which is a descriptor used to quantify the topological complexity of a molecule. It provides a numerical value that represents the branching and connectivity of atoms within a molecular structure.                                                                                                                                                                                                                                                                                                                                                                                                           |
| TopoPSA               |            | Compute the topological polar surface area based on fragment contributions.                                                                                                                                                                                                                                                                                                                                                                                                                                                                                                                                                                    |
| WTPT-1                | WTPT-2     | Calculate the weighted path (molecular ID) descriptors, as described by Randic, are used to characterize the branching patterns within a molecule. These descriptors assign weights to the paths between atoms in a molecular graph, reflecting the importance of each path in terms of molecular branching.                                                                                                                                                                                                                                                                                                                                   |
| WTPT-3                | WTPT-4     |                                                                                                                                                                                                                                                                                                                                                                                                                                                                                                                                                                                                                                                |
| WTPT-5                |            |                                                                                                                                                                                                                                                                                                                                                                                                                                                                                                                                                                                                                                                |
| WPATH                 | WPOL       | The Wiener path number and Wiener polarity number are descriptors used to quantify the topological complexity and polarity of a molecule, respectively. The Wiener path number calculates the sum of the distances between all pairs of atoms in a molecular graph. It provides a measure of the overall molecular size and branching. On the other hand, the Wiener polarity number evaluates the sum of the distances between pairs of atoms in the molecular graph, considering the type of bond connecting them. It characterizes the polar nature of a molecule by considering the differences in electronegativity between bonded atoms. |
| Zagreb                |            | The sum of the squared atom degrees of all heavy atoms is a descriptor used to measure the complexity and connectivity of heavy atoms in a molecule.                                                                                                                                                                                                                                                                                                                                                                                                                                                                                           |
| Electronic parameters |            |                                                                                                                                                                                                                                                                                                                                                                                                                                                                                                                                                                                                                                                |

|                                                                                                                                                                                                                 |                                                                                                                                                                                                                                             |
|-----------------------------------------------------------------------------------------------------------------------------------------------------------------------------------------------------------------|---------------------------------------------------------------------------------------------------------------------------------------------------------------------------------------------------------------------------------------------|
| Apol                                                                                                                                                                                                            | Calculate the sum of the atomic polarizabilities, including implicit hydrogens, is a measure of the overall electron cloud distortion capability of a molecule.                                                                             |
| Bpol                                                                                                                                                                                                            | Calculate the sum of the absolute value of the difference between the atomic polarizabilities of all bonded atoms in the molecule, including implicit hydrogens, quantifies the variation in electron cloud distortion between bonded atoms |
| PPSA-1 PPSA-2 PPSA-3 PNSA-1<br>PNSA-2 PNSA-3 DPSA-1 DPSA-2<br>DPSA-3 FPSA-1 FPSA-2 FPSA-3<br>FNSA-1 FNSA-2 FNSA-3 WPSA-1<br>WPSA-2 WPSA-3 WNSA-1<br>WNSA-2 WNSA-3 RPCG RNCG<br>RPCS RNCS THSA TPSA<br>RHSa RPSA | A list of descriptors that combine partial charge information with surface area                                                                                                                                                             |
| nHBAcc                                                                                                                                                                                                          | Hydrogen bond acceptors                                                                                                                                                                                                                     |
| nHBDon                                                                                                                                                                                                          | Hydrogen bond donors                                                                                                                                                                                                                        |
| <b>Constitutional parameters</b>                                                                                                                                                                                |                                                                                                                                                                                                                                             |
| nA nR nN nD nC nF nQ nE nG nH nI nP nL nK nM nS nT nY nV nW                                                                                                                                                     |                                                                                                                                                                                                                                             |
| naAromAtom                                                                                                                                                                                                      | Number of amino acids                                                                                                                                                                                                                       |
| nAtom                                                                                                                                                                                                           | Number of aromatic atoms                                                                                                                                                                                                                    |
| nB                                                                                                                                                                                                              | Number of atoms                                                                                                                                                                                                                             |
| nAtomLC                                                                                                                                                                                                         | Number of bonds                                                                                                                                                                                                                             |
| nAtomP                                                                                                                                                                                                          | Number of atoms located in the longest chain                                                                                                                                                                                                |
| nRotB                                                                                                                                                                                                           | Number of atoms located in the longest $\pi$ chain                                                                                                                                                                                          |
| LipinskiFailures                                                                                                                                                                                                | Number of non-rotatable bonds                                                                                                                                                                                                               |
| MW                                                                                                                                                                                                              | Number of violations of Lipinski's Rule Of Five                                                                                                                                                                                             |
| XLogP                                                                                                                                                                                                           | Molecular Weight                                                                                                                                                                                                                            |
|                                                                                                                                                                                                                 | Partition coefficient                                                                                                                                                                                                                       |
| <b>Hybrid parameters</b>                                                                                                                                                                                        |                                                                                                                                                                                                                                             |
| BCUTw-1l BCUTw-1h BCUTc-1l BCUTc-1h BCUTp-1l BCUTp-1h                                                                                                                                                           |                                                                                                                                                                                                                                             |
| Wlambda1.unity                                                                                                                                                                                                  | Eigenvalue based descriptors used in chemical diversity described by Pearlman et al.                                                                                                                                                        |
| Wlambda2.unity                                                                                                                                                                                                  |                                                                                                                                                                                                                                             |
| Wlambda3.unity                                                                                                                                                                                                  |                                                                                                                                                                                                                                             |
| Wnu1.unity                                                                                                                                                                                                      |                                                                                                                                                                                                                                             |
| Wnu2.unity                                                                                                                                                                                                      |                                                                                                                                                                                                                                             |
| Wgamma1.unity                                                                                                                                                                                                   |                                                                                                                                                                                                                                             |
| Wgamma2.unity                                                                                                                                                                                                   |                                                                                                                                                                                                                                             |
| Wgamma3.unity                                                                                                                                                                                                   |                                                                                                                                                                                                                                             |
| Weta1.unity                                                                                                                                                                                                     |                                                                                                                                                                                                                                             |
| Weta2.unity                                                                                                                                                                                                     |                                                                                                                                                                                                                                             |
| Weta3.unity                                                                                                                                                                                                     |                                                                                                                                                                                                                                             |
| WT.unity WA.unity WV.unity                                                                                                                                                                                      |                                                                                                                                                                                                                                             |
| WK.unity WG.unity WD.unity                                                                                                                                                                                      |                                                                                                                                                                                                                                             |

| Holistic descriptors described by Todeschini et al. |           |                                                                                                                                                                                      |                                                                                                  |        |        |
|-----------------------------------------------------|-----------|--------------------------------------------------------------------------------------------------------------------------------------------------------------------------------------|--------------------------------------------------------------------------------------------------|--------|--------|
| Geometrical parameters                              |           |                                                                                                                                                                                      |                                                                                                  |        |        |
| GRAV-1                                              |           | GRAV-2                                                                                                                                                                               |                                                                                                  |        |        |
| GRAV-3                                              | GRAVH-1   | GRAVH-2                                                                                                                                                                              | GRAVH-3                                                                                          | GRAV-4 | GRAV-5 |
|                                                     |           | GRAV-6                                                                                                                                                                               |                                                                                                  |        |        |
| LOBMAX                                              | LOBMIN    | Characterizes the mass distribution                                                                                                                                                  |                                                                                                  |        |        |
| MOMI-X                                              |           | MOMI-Y                                                                                                                                                                               | Calculates the proportional relationship between the length and breadth dimensions of a molecule |        |        |
| MOMI-Z                                              |           | MOMI-XY                                                                                                                                                                              |                                                                                                  |        |        |
| XY                                                  | MOMI-XZ   | MOMI-YZ                                                                                                                                                                              |                                                                                                  |        |        |
| MOMI-R                                              |           |                                                                                                                                                                                      |                                                                                                  |        |        |
| topoShape                                           | geomShape | Compute the principal moments of inertia and ratios of the principal moments.                                                                                                        |                                                                                                  |        |        |
|                                                     |           | Calculate the topological and geometric shape indices described by Petitjean and Bath et al. respectively, are measures that assess the anisotropy or shape asymmetry of a molecule. |                                                                                                  |        |        |

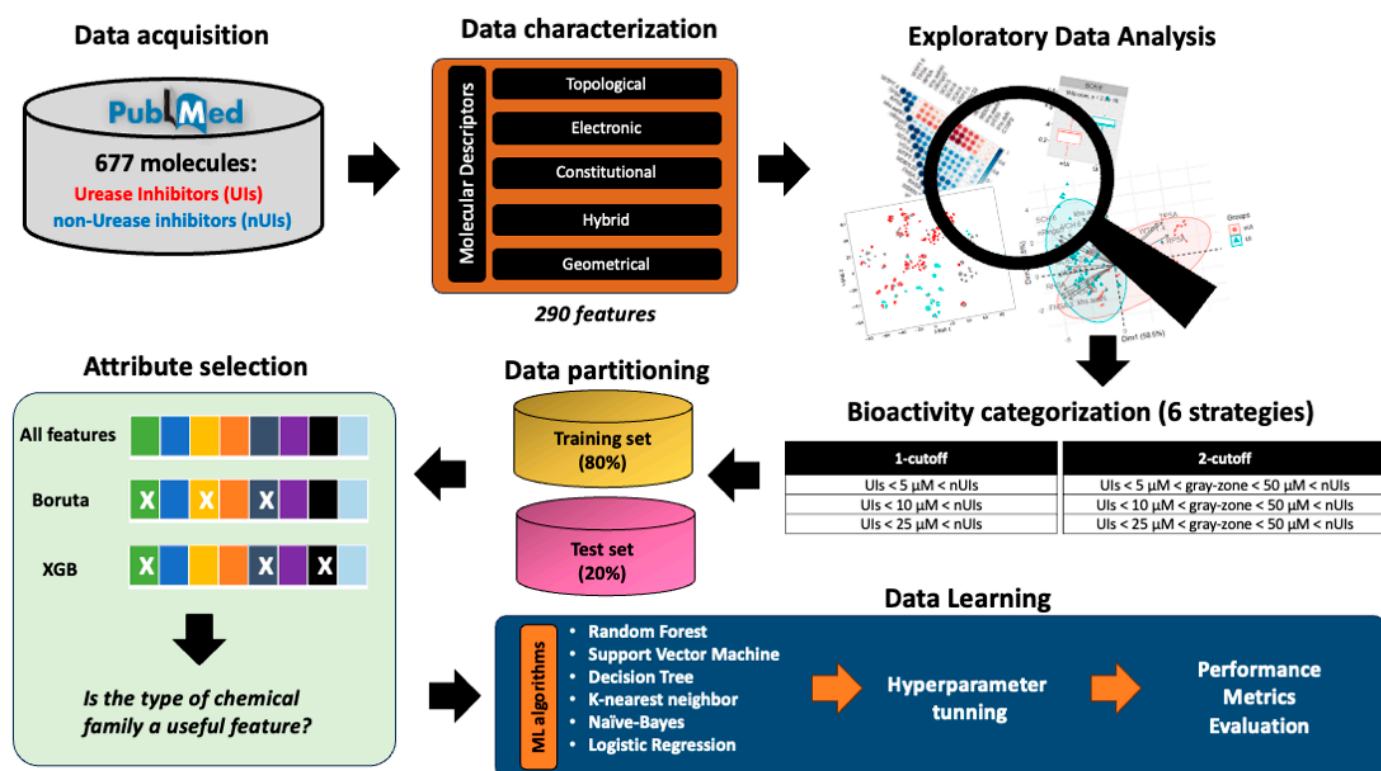

**Figure S1. Schematic workflow.** Each stage of the protocol is represented as follow: 1) Data acquisition, 2) Data characterization, 3) Exploratory Data Analysis, 4) Bioactive categorization, 5) Data partitioning, 6) Attribute selection, and 7) Data Learning.

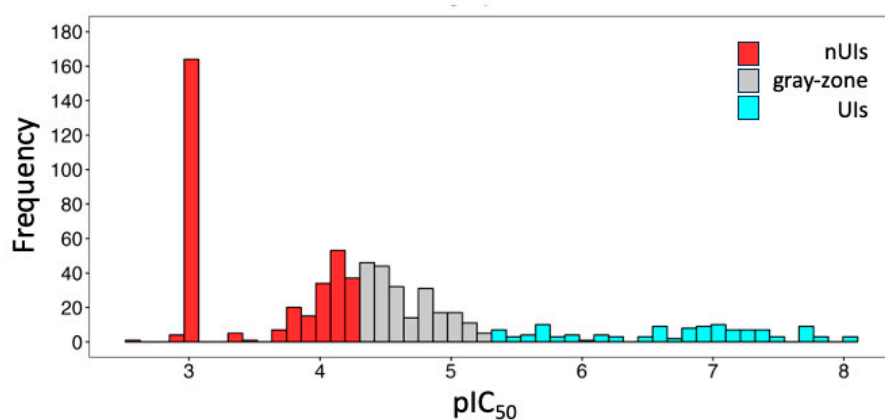

**Figure S2. Distribution of the dataset based on bioactive characterization.** The histogram illustrates the frequency of the three labeled groups: non-urease inhibitors (nUIs) in red, urease inhibitors (UIs) in cyan, and molecules falling within the  $4.3 > \text{pIC}_{50} < 5.3$  range, referred to as the gray-zone, shown in gray.

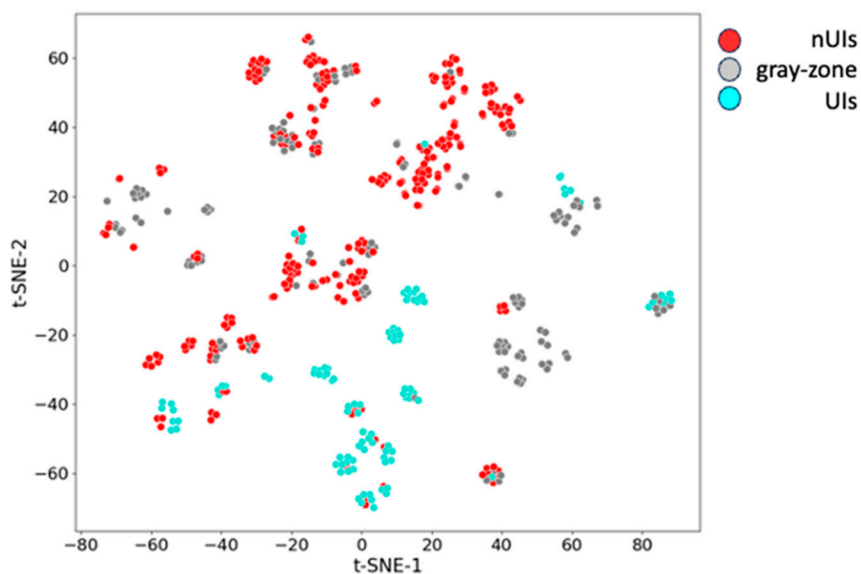

**Figure S3. t-SNE dimensional map**, where each data point represents a distinct compound categorized as a urease inhibitor (UIs) indicated in cyan, encompassing molecules exhibiting an  $\text{IC}_{50} \leq 5 \mu\text{M}$ . Similarly, non-urease inhibitors (nUIs) are denoted in red, encompassing molecules with an  $\text{IC}_{50} \geq 50 \mu\text{M}$ . Additionally, compounds existing in the gray-zone, defined by  $\text{IC}_{50}$  values falling within the range of  $5 > \text{IC}_{50} < 50$ , are shaded in gray.

**Disclaimer/Publisher's Note:** The statements, opinions and data contained in all publications are solely those of the individual author(s) and contributor(s) and not of MDPI and/or the editor(s). MDPI and/or the editor(s) disclaim responsibility for any injury to people or property resulting from any ideas, methods, instructions or products referred to in the content.
